# Supplementary material for: Evaluation of the Immune Response of a Candidate Phage-Based Vaccine against Rhipicephalus microplus (Cattle Tick)
Source: MDPI journal article supplement (doi:10.3390/pharmaceutics13122018), 2021-11-26
Supplement: s1 [file s1]

# Supplementary Materials: Evaluation of the Immune Response of a Candidate Phage-Based Vaccine against *Rhipicephalus microplus* (Cattle Tick)

Alejandro González-Mora, Kenny Misael Calvillo-Rodríguez, Jesús Hernández-Pérez, Marco Rito-Palomares, Ana Carolina Martínez-Torres and Jorge Benavides

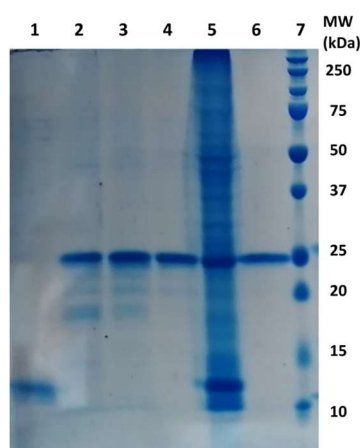

**Figure S1.** SDS-PAGE analysis of the expression of recombinant antigens. (1) Purified recombinant Sbm7462 antigen; (2) Elution 2 Subolesin; (3) Elution 3 Subolesin; (4) Elution 5 Subolesin; (5) No binding Subolesin; (6) Elution 8 Subolesin; (7) Molecular weight marker.

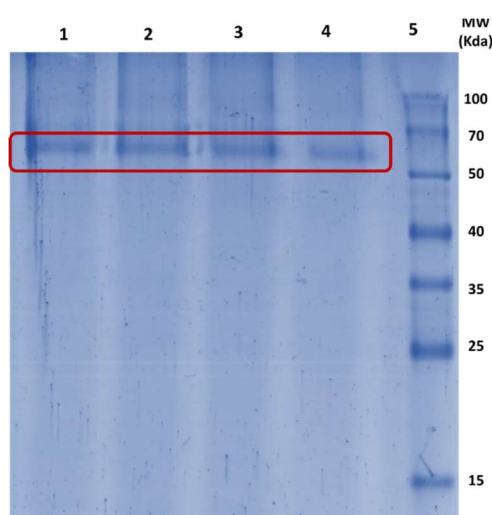

**Figure S2.** SDS-PAGE analysis of the extraction of the recombinant antigen Bm86 from the commercial vaccine Bovimune Ixovac. (1) Bm86 antigen from bottom phase; (2–4) Bm86 antigen from middle phase obtained with independent experiments; (5) Molecular weight marker.
